# Supplementary material for: 3D bioprinting of heterogeneous tissue-engineered skin containing human dermal fibroblasts and keratinocytes
Source: Royal Society of Chemistry journal article supplement (doi:10.1039/d2bm02092k), 2023-01-01
Supplement: d2bm02092k1.pdf [file d2bm02092k1.pdf]

## Supplementary material

### 3D bioprinting of heterogeneous tissue-engineered skin containing human dermal fibroblasts and keratinocytes

Meng Li, Lei Sun, Zixian Liu, Zhizhong Shen, Yanyan Cao, Lu Han, Shengbo Sang\*,  
Jianming Wang\*

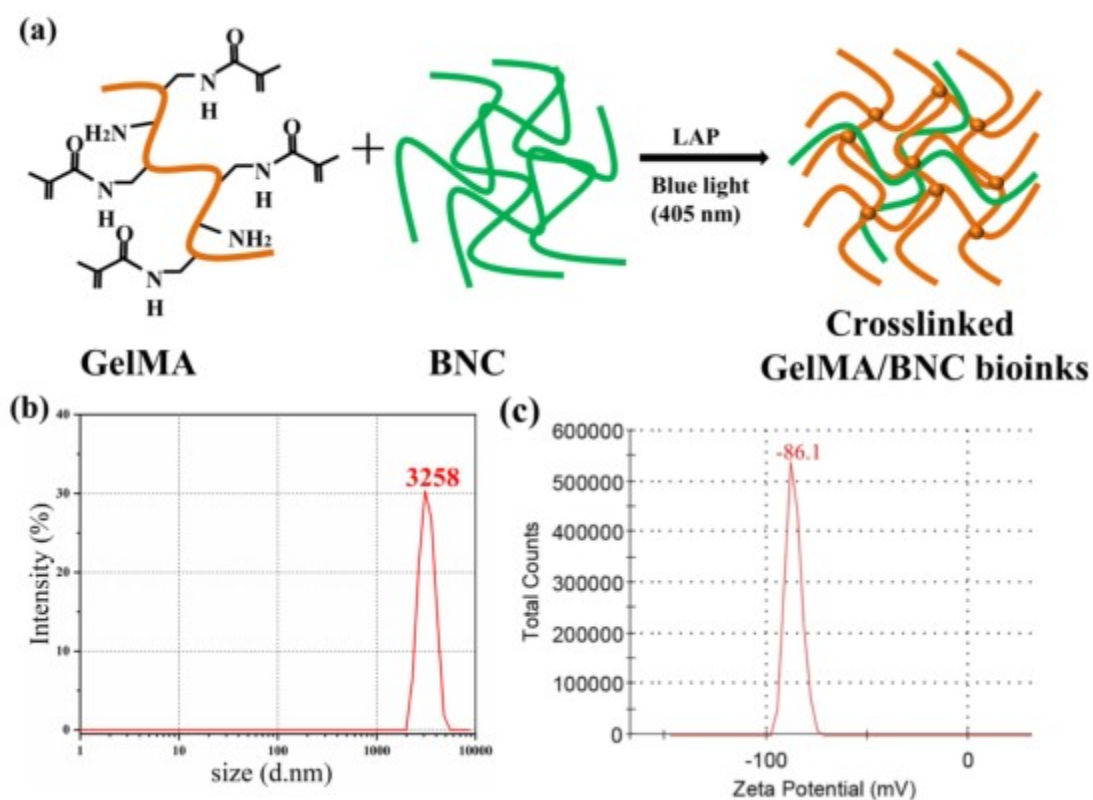

Figure S1. Preparation of crosslinked GelMA/BNC bioinks and characterization of BNC particles. (a) Scheme of crosslinked GelMA/BNC bioinks preparation. (b) Dynamic light scattering analysis for size distribution of BNC particles. (c) Zeta potential of homogenized BNC solution.

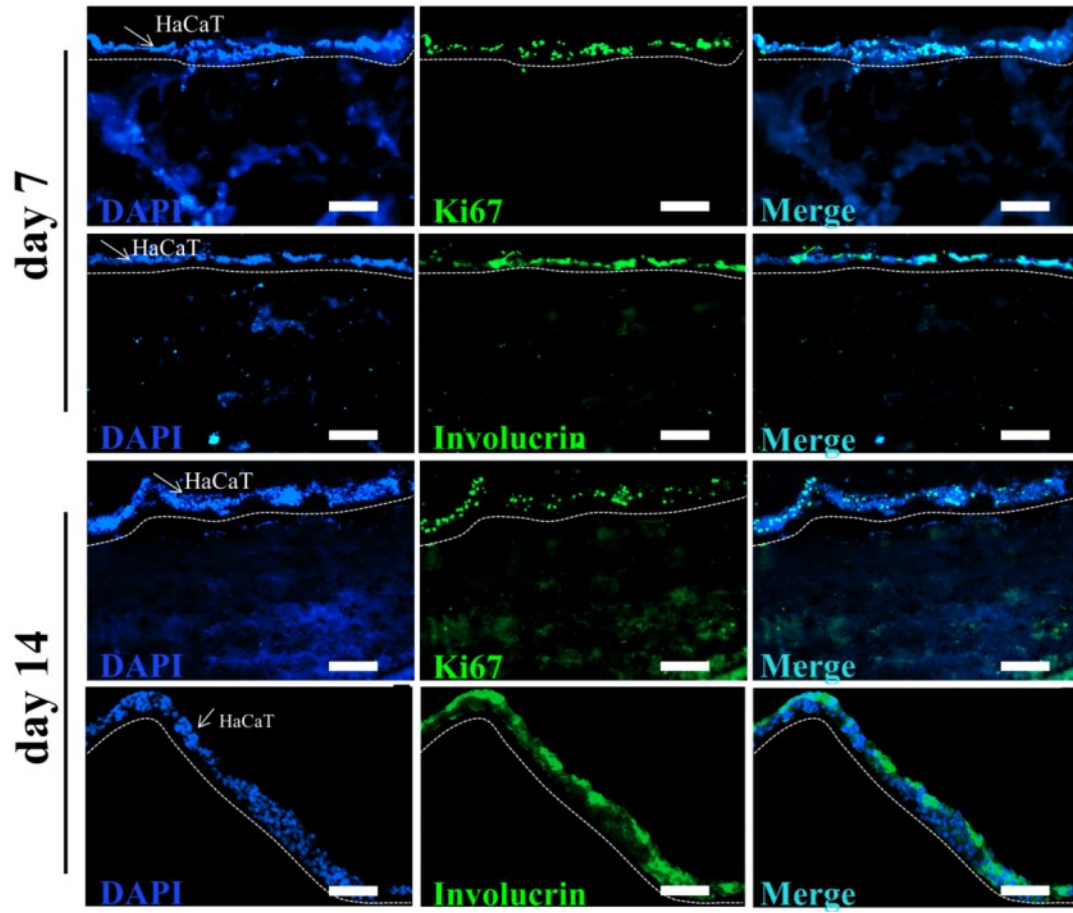

Figure S2. Immunofluorescence analysis of HTS after 7 and 14 days of culture at ALI (Ki67: proliferation marker, involucrin: late differentiation marker and DAPI: nucleus). Scale bar =200  $\mu\text{m}$ .
